# Supplementary material for: Double dome structure of the Bose–Einstein condensation in diluted S = 3/2 quantum magnets
Source: Springer Nature journal article supplement (doi:10.1038/s41467-023-36725-4), 2023-03-10
Supplement: 41467_2023_36725_MOESM3_ESM.pdf [file 41467_2023_36725_MOESM3_ESM.pdf]

**File name: Supplementary Software 1**

**Description: Python script for finite temperature mean field calculations.** The function `self_consistent_solver(field, temperature)` takes as input the magnetic field and the temperature, and returns the simulated thermal averages of the spin moment and the spin-induced electric dipole moment at sublattices *A* and *B*.
